# Supplementary material
Source: Springer Nature journal article supplement (https://www.springermedizin.de/resource/supplementary/12885_2012_3816_MOESM3_ESM.pdf/9465274)

**PBLs****ACC****IDC****D17D855  
MICROSATELLITE**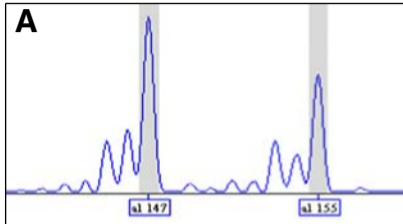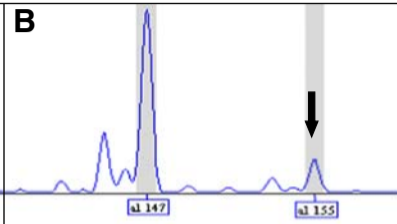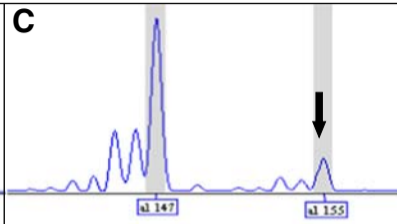**SEQUENCING OF  
c.4484G>T MUTATION**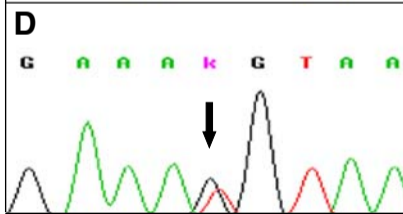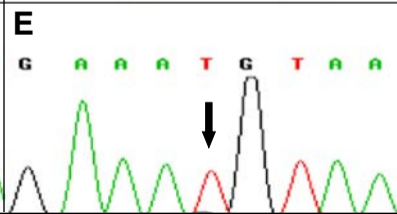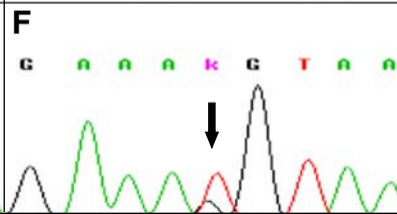

Supplement: MOESM3 [file 9465274]
